# Supplementary material for: Identification of Heat Shock Transcription Factor Genes Involved in Thermotolerance of Octoploid Cultivated Strawberry
Source: MDPI journal article supplement (doi:10.3390/ijms17122130), 2016-12-17
Supplement: s1 [file s1]

# Supplementary Materials: Identification of Heat Shock Transcription Factor Genes Involved in Thermotolerance of Octoploid Cultivated Strawberry

Wan-Yu Liao, Lee-Fong Lin, Jing-Lian Jheng, Chun-Chung Wang, Jui-Hung Yang and Ming-Lun Chou

**Table S1.** Categorization of strawberry unigenes to KEGG biochemical pathways.

| Number | Pathway                                               | All Genes with Pathway Annotation (26776) | Pathway ID |
|--------|-------------------------------------------------------|-------------------------------------------|------------|
| 1      | Metabolic pathways                                    | 6911 (25.81%)                             | ko01100    |
| 2      | Biosynthesis of secondary metabolites                 | 2998 (11.2%)                              | ko01110    |
| 3      | Plant-pathogen interaction                            | 1817 (6.79%)                              | ko04626    |
| 4      | Endocytosis                                           | 1598 (5.97%)                              | ko04144    |
| 5      | Glycerophospholipid metabolism                        | 1497 (5.59%)                              | ko00564    |
| 6      | Ether lipid metabolism                                | 1336 (4.99%)                              | ko00565    |
| 7      | Plant hormone signal transduction                     | 1297 (4.84%)                              | ko04075    |
| 8      | RNA transport                                         | 1183 (4.42%)                              | ko03013    |
| 9      | Spliceosome                                           | 1006 (3.76%)                              | ko03040    |
| 10     | Starch and sucrose metabolism                         | 984 (3.67%)                               | ko00500    |
| 11     | Purine metabolism                                     | 863 (3.22%)                               | ko00230    |
| 12     | Pyrimidine metabolism                                 | 799 (2.98%)                               | ko00240    |
| 13     | Protein processing in endoplasmic reticulum           | 710 (2.65%)                               | ko04141    |
| 14     | Pentose and glucuronate interconversions              | 628 (2.35%)                               | ko00040    |
| 15     | RNA polymerase                                        | 598 (2.23%)                               | ko03020    |
| 16     | mRNA surveillance pathway                             | 597 (2.23%)                               | ko03015    |
| 17     | Ribosome                                              | 540 (2.02%)                               | ko03010    |
| 18     | Phenylpropanoid biosynthesis                          | 477 (1.78%)                               | ko00940    |
| 19     | RNA degradation                                       | 468 (1.75%)                               | ko03018    |
| 20     | Ribosome biogenesis in eukaryotes                     | 453 (1.69%)                               | ko03008    |
| 21     | Ubiquitin mediated proteolysis                        | 431 (1.61%)                               | ko04120    |
| 22     | Zeatin biosynthesis                                   | 360 (1.34%)                               | ko00908    |
| 23     | Glycolysis / Gluconeogenesis                          | 344 (1.28%)                               | ko00010    |
| 24     | ABC transporters                                      | 319 (1.19%)                               | ko02010    |
| 25     | Flavonoid biosynthesis                                | 302 (1.13%)                               | ko00941    |
| 26     | Oxidative phosphorylation                             | 296 (1.11%)                               | ko00190    |
| 27     | Amino sugar and nucleotide sugar metabolism           | 292 (1.09%)                               | ko00520    |
| 28     | Stilbenoid, diarylheptanoid and gingerol biosynthesis | 275 (1.03%)                               | ko00945    |
| 29     | Nucleotide excision repair                            | 262 (0.98%)                               | ko03420    |
| 30     | Terpenoid backbone biosynthesis                       | 250 (0.93%)                               | ko00900    |
| 31     | Phagosome                                             | 220 (0.82%)                               | ko04145    |
| 32     | Circadian rhythm-plant                                | 219 (0.82%)                               | ko04712    |
| 33     | Galactose metabolism                                  | 209 (0.78%)                               | ko00052    |
| 34     | Phenylalanine metabolism                              | 206 (0.77%)                               | ko00360    |
| 35     | Limonene and pinene degradation                       | 205 (0.77%)                               | ko00903    |
| 36     | Carotenoid biosynthesis                               | 205 (0.77%)                               | ko00906    |
| 37     | Pyruvate metabolism                                   | 203 (0.76%)                               | ko00620    |
| 38     | Homologous recombination                              | 200 (0.75%)                               | ko03440    |
| 39     | Glutathione metabolism                                | 194 (0.72%)                               | ko00480    |
| 40     | Tyrosine metabolism                                   | 185 (0.69%)                               | ko00350    |
| 41     | Cysteine and methionine metabolism                    | 182 (0.68%)                               | ko00270    |
| 42     | Fructose and mannose metabolism                       | 181 (0.68%)                               | ko00051    |
| 43     | Peroxisome                                            | 180 (0.67%)                               | ko04146    |
| 44     | Phosphatidylinositol signaling system                 | 179 (0.67%)                               | ko04070    |
| 45     | Ascorbate and aldarate metabolism                     | 179 (0.67%)                               | ko00053    |
| 46     | Arginine and proline metabolism                       | 176 (0.66%)                               | ko00330    |
| 47     | Basal transcription factors                           | 172 (0.64%)                               | ko03022    |
| 48     | Inositol phosphate metabolism                         | 172 (0.64%)                               | ko00562    |

Table S1. Cont.

| Number | Pathway                                                | All Genes with Pathway Annotation (26776) | Pathway ID |
|--------|--------------------------------------------------------|-------------------------------------------|------------|
| 49     | Other glycan degradation                               | 171 (0.64%)                               | ko00511    |
| 50     | Cutin, suberine and wax biosynthesis                   | 169 (0.63%)                               | ko00073    |
| 51     | Aminoacyl-tRNA biosynthesis                            | 169 (0.63%)                               | ko00970    |
| 52     | Cyanoamino acid metabolism                             | 166 (0.62%)                               | ko00460    |
| 53     | Glycerolipid metabolism                                | 159 (0.59%)                               | ko00561    |
| 54     | DNA replication                                        | 156 (0.58%)                               | ko03030    |
| 55     | Glycosylphosphatidylinositol (GPI)-anchor biosynthesis | 154 (0.58%)                               | ko00563    |
| 56     | Carbon fixation in photosynthetic organisms            | 153 (0.57%)                               | ko00710    |
| 57     | Mismatch repair                                        | 152 (0.57%)                               | ko03430    |
| 58     | Fatty acid metabolism                                  | 152 (0.57%)                               | ko00071    |
| 59     | Flavone and flavonol biosynthesis                      | 152 (0.57%)                               | ko00944    |
| 60     | Pentose phosphate pathway                              | 147 (0.55%)                               | ko00030    |
| 61     | Base excision repair                                   | 146 (0.55%)                               | ko03410    |
| 62     | alpha-Linolenic acid metabolism                        | 140 (0.52%)                               | ko00592    |
| 63     | Porphyrin and chlorophyll metabolism                   | 135 (0.5%)                                | ko00860    |
| 64     | Glycine, serine and threonine metabolism               | 133 (0.5%)                                | ko00260    |
| 65     | Citrate cycle (TCA cycle)                              | 133 (0.5%)                                | ko00020    |
| 66     | Alanine, aspartate and glutamate metabolism            | 132 (0.49%)                               | ko00250    |
| 67     | Ubiquinone and other terpenoid-quinone biosynthesis    | 130 (0.49%)                               | ko00130    |
| 68     | Glyoxylate and dicarboxylate metabolism                | 123 (0.46%)                               | ko00630    |
| 69     | Regulation of autophagy                                | 119 (0.44%)                               | ko04140    |
| 70     | Protein export                                         | 116 (0.43%)                               | ko03060    |
| 71     | Valine, leucine and isoleucine degradation             | 116 (0.43%)                               | ko00280    |
| 72     | Diterpenoid biosynthesis                               | 111 (0.41%)                               | ko00904    |
| 73     | Propanoate metabolism                                  | 103 (0.38%)                               | ko00640    |
| 74     | N-Glycan biosynthesis                                  | 102 (0.38%)                               | ko00510    |
| 75     | Phenylalanine, tyrosine and tryptophan biosynthesis    | 99 (0.37%)                                | ko00400    |
| 76     | Brassinosteroid biosynthesis                           | 95 (0.35%)                                | ko00905    |
| 77     | Brassinosteroid biosynthesis                           | 95 (0.35%)                                | ko00905    |
| 78     | Proteasome                                             | 93 (0.35%)                                | ko03050    |
| 79     | Sphingolipid metabolism                                | 92 (0.34%)                                | ko00600    |
| 80     | Biosynthesis of unsaturated fatty acids                | 90 (0.34%)                                | ko01040    |
| 81     | β-Alanine metabolism                                   | 84 (0.31%)                                | ko00410    |
| 82     | SNARE interactions in vesicular transport              | 84 (0.31%)                                | ko04130    |
| 83     | Photosynthesis                                         | 83 (0.31%)                                | ko00195    |
| 84     | Isoquinoline alkaloid biosynthesis                     | 81 (0.3%)                                 | ko00950    |
| 85     | Tryptophan metabolism                                  | 79 (0.3%)                                 | ko00380    |
| 86     | Sesquiterpenoid and triterpenoid biosynthesis          | 77 (0.29%)                                | ko00909    |
| 87     | Natural killer cell mediated cytotoxicity              | 75 (0.28%)                                | ko04650    |
| 88     | Steroid biosynthesis                                   | 72 (0.27%)                                | ko00100    |
| 89     | Lysine degradation                                     | 72 (0.27%)                                | ko00310    |
| 90     | Pantothenate and CoA biosynthesis                      | 72 (0.27%)                                | ko00770    |
| 91     | Benzoxazinoid biosynthesis                             | 70 (0.26%)                                | ko00402    |
| 92     | Sulfur metabolism                                      | 65 (0.24%)                                | ko00920    |
| 93     | Glycosaminoglycan degradation                          | 63 (0.24%)                                | ko00531    |
| 94     | Isoflavonoid biosynthesis                              | 62 (0.23%)                                | ko00943    |
| 95     | Tropane, piperidine and pyridine alkaloid biosynthesis | 61 (0.23%)                                | ko00960    |
| 96     | Circadian rhythm-mammal                                | 59 (0.22%)                                | ko04710    |
| 97     | Linoleic acid metabolism                               | 56 (0.21%)                                | ko00591    |
| 98     | Butanoate metabolism                                   | 56 (0.21%)                                | ko00650    |
| 99     | Fatty acid biosynthesis                                | 55 (0.21%)                                | ko00061    |
| 100    | Fatty acid elongation                                  | 49 (0.18%)                                | ko00062    |
| 101    | Glycosphingolipid biosynthesis—ganglio series          | 44 (0.16%)                                | ko00604    |
| 102    | Riboflavin metabolism                                  | 44 (0.16%)                                | ko00740    |
| 103    | Folate biosynthesis                                    | 43 (0.16%)                                | ko00790    |
| 104    | Lysine biosynthesis                                    | 40 (0.15%)                                | ko00300    |

**Table S1.** *Cont.*

| Number | Pathway                                     | All Genes with Pathway Annotation (26776) | Pathway ID |
|--------|---------------------------------------------|-------------------------------------------|------------|
| 105    | Valine, leucine and isoleucine biosynthesis | 40 (0.15%)                                | ko00290    |
| 106    | Vitamin B6 metabolism                       | 40 (0.15%)                                | ko00750    |
| 107    | Nicotinate and nicotinamide metabolism      | 38 (0.14%)                                | ko00760    |
| 108    | Non-homologous end-joining                  | 37 (0.14%)                                | ko03450    |
| 109    | Selenocompound metabolism                   | 36 (0.13%)                                | ko00450    |
| 110    | Monoterpenoid biosynthesis                  | 36 (0.13%)                                | ko00902    |
| 111    | One carbon pool by folate                   | 35 (0.13%)                                | ko00670    |
| 112    | Photosynthesis-antenna proteins             | 33 (0.12%)                                | ko00196    |
| 113    | Arachidonic acid metabolism                 | 33 (0.12%)                                | ko00590    |
| 114    | Histidine metabolism                        | 32 (0.12%)                                | ko00340    |
| 115    | Glucosinolate biosynthesis                  | 32 (0.12%)                                | ko00966    |
| 116    | Other types of O-glycan biosynthesis        | 30 (0.11%)                                | ko00514    |
| 117    | Glycosphingolipid biosynthesis—globo series | 29 (0.11%)                                | ko00603    |
| 118    | Thiamine metabolism                         | 26 (0.1%)                                 | ko00730    |
| 119    | Indole alkaloid biosynthesis                | 25 (0.09%)                                | ko00901    |
| 120    | Sulfur relay system                         | 22 (0.08%)                                | ko04122    |
| 121    | Taurine and hypotaurine metabolism          | 18 (0.07%)                                | ko00430    |
| 122    | Anthocyanin biosynthesis                    | 16 (0.06%)                                | ko00942    |
| 123    | Synthesis and degradation of ketone bodies  | 11 (0.04%)                                | ko00072    |
| 124    | C5-Branched dibasic acid metabolism         | 10 (0.04%)                                | ko00660    |
| 125    | Lipoic acid metabolism                      | 8 (0.03%)                                 | ko00785    |
| 126    | Biotin metabolism                           | 8 (0.03%)                                 | ko00780    |
| 127    | Caffeine metabolism                         | 4 (0.01%)                                 | ko00232    |
| 128    | Betalain biosynthesis                       | 3 (0.01%)                                 | ko00965    |

**Table S2.** Strawberry contigs and unigenes that were homologous with heat shock transcription factor-like genes.

**Table S3.** Characteristics of genes encoding heat shock transcription factor proteins in *F. × ananassa* Duch. cv. *Toyonoka*.

**Table S4.** Primers designed for RT-PCR analysis in this study.

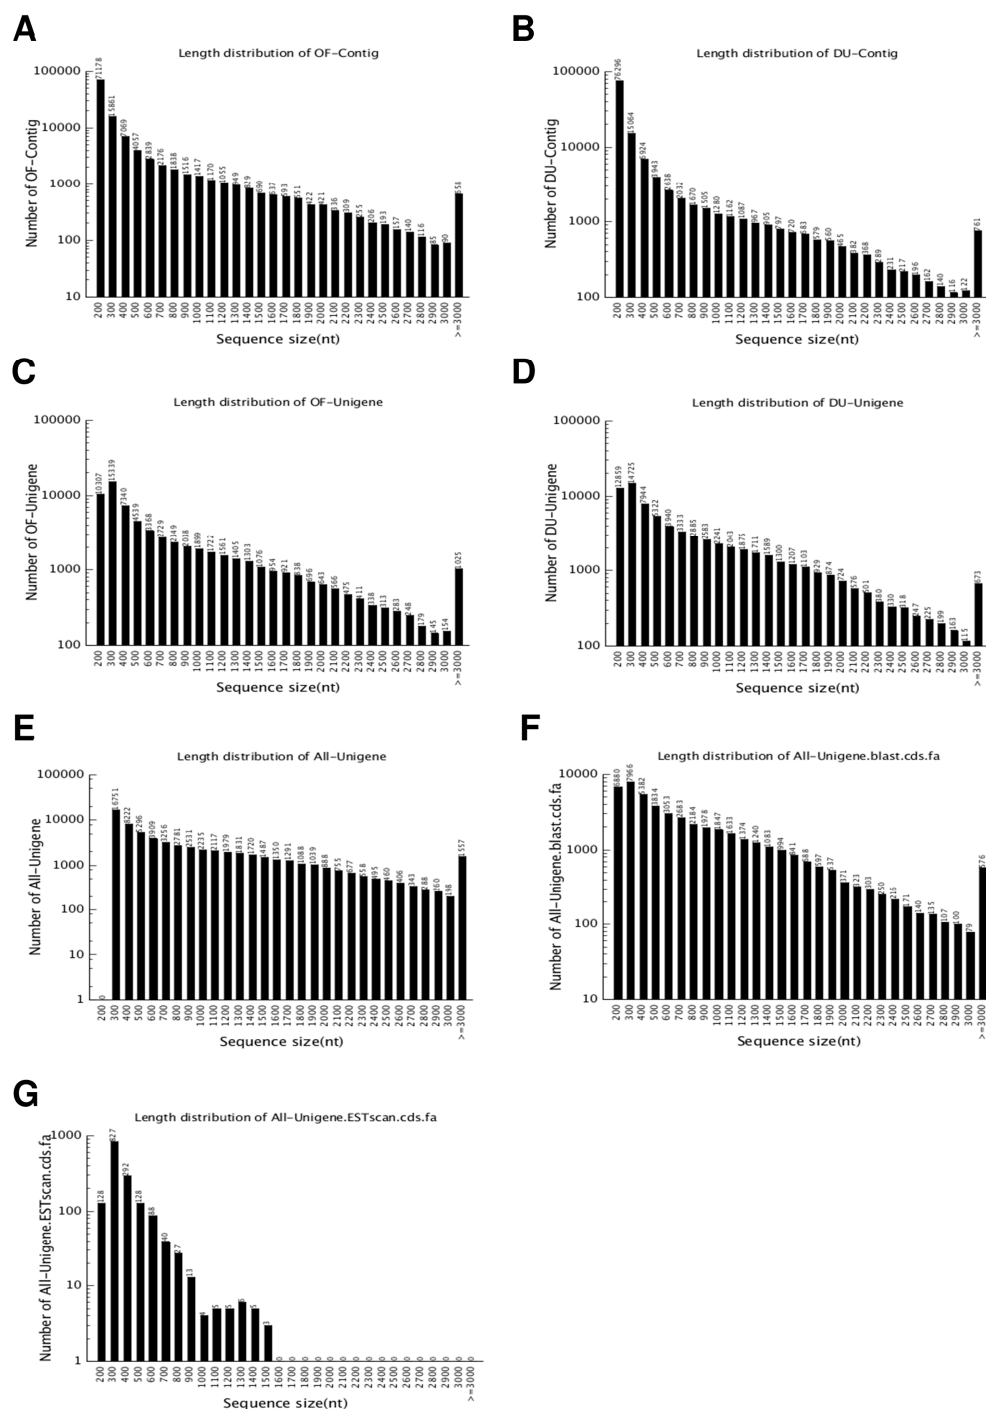

**Figure S1.** Overview of the size distribution of contigs, unigenes, CDS, and ESTs from 3 strawberry transcriptome assemblies. (A) The size distribution of the OF-contigs obtained from our de novo assembly of high-quality clean reads generated from OF transcriptome database; (B) The size distribution of the DU-contigs obtained from our de novo assembly of high-quality clean reads established from the DU transcriptome database; (C) The size distribution of the OF-unigenes produced from further assembly of OF-contigs; (D) The size distribution of the DU-unigenes developed from further assembly of DU-contigs; (E) The size distribution of the ALL-unigenes created by combining OF and DU-unigenes and removing the overlapped unigenes from these 2 databases; (F) The size distribution of the CDS produced by searching ALL-unigene sequences against Nr, SWISS-PROT, KEGG, and COG databases, in that order, by using the BLASTX program ( $E$ -value  $< 10^{-5}$ ); (G) The size distributions of the ALL-unigene ESTs retrieved from the ESTScan results. For ALL-unigene CDS that had no hits in the searched databases, the BLAST results were subjected to ESTScans and subsequently translated into peptide sequences.

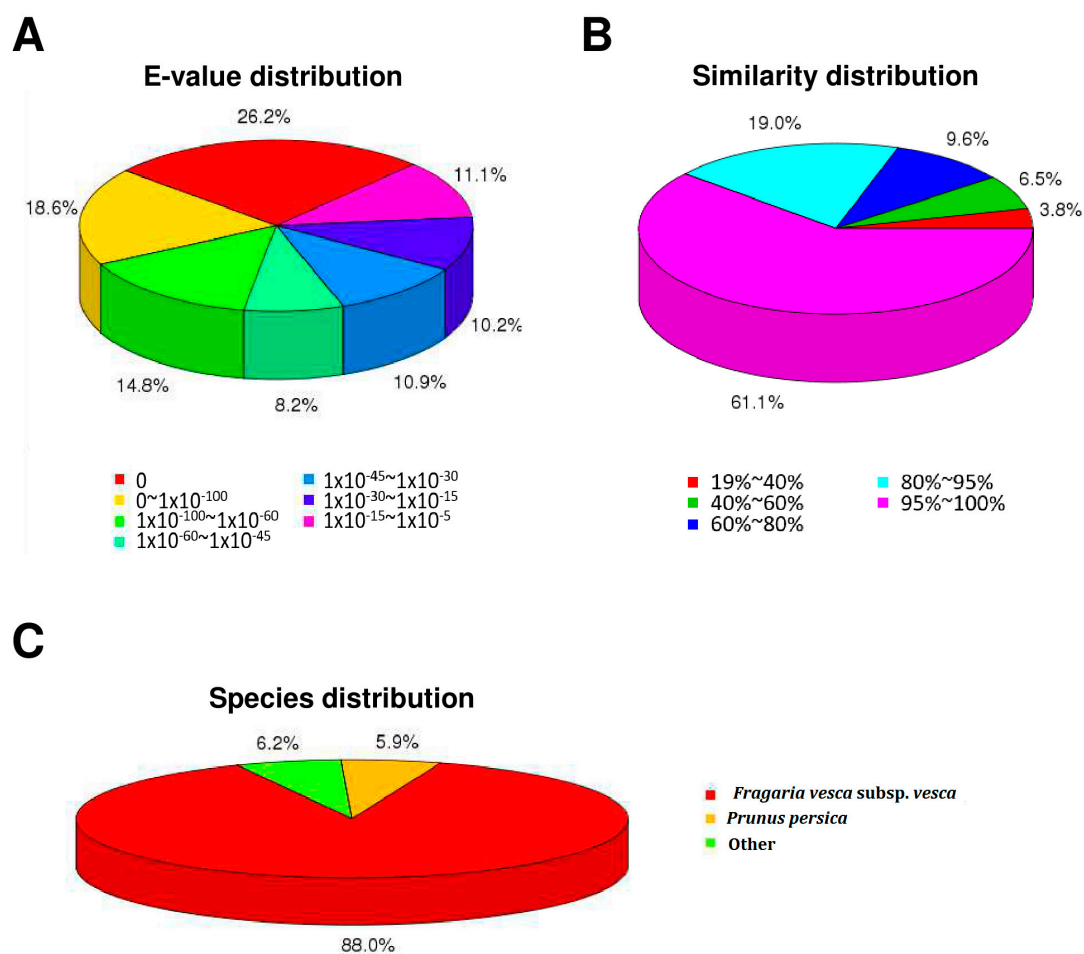

**Figure S2.** Characteristics of the homology search of the assembled sequences against the Nr database. (A) The *E*-value distribution of BLAST hits for each unique sequence, with a cut-off *E*-value of  $\leq 10^{-5}$ ; (B) Similarity distribution of the top BLAST hits for each sequence; (C) Species distribution is shown as a percentage of the total homologous sequences with *E*-value  $\leq 10^{-5}$ . The first hit of each sequence was used for statistical analysis.

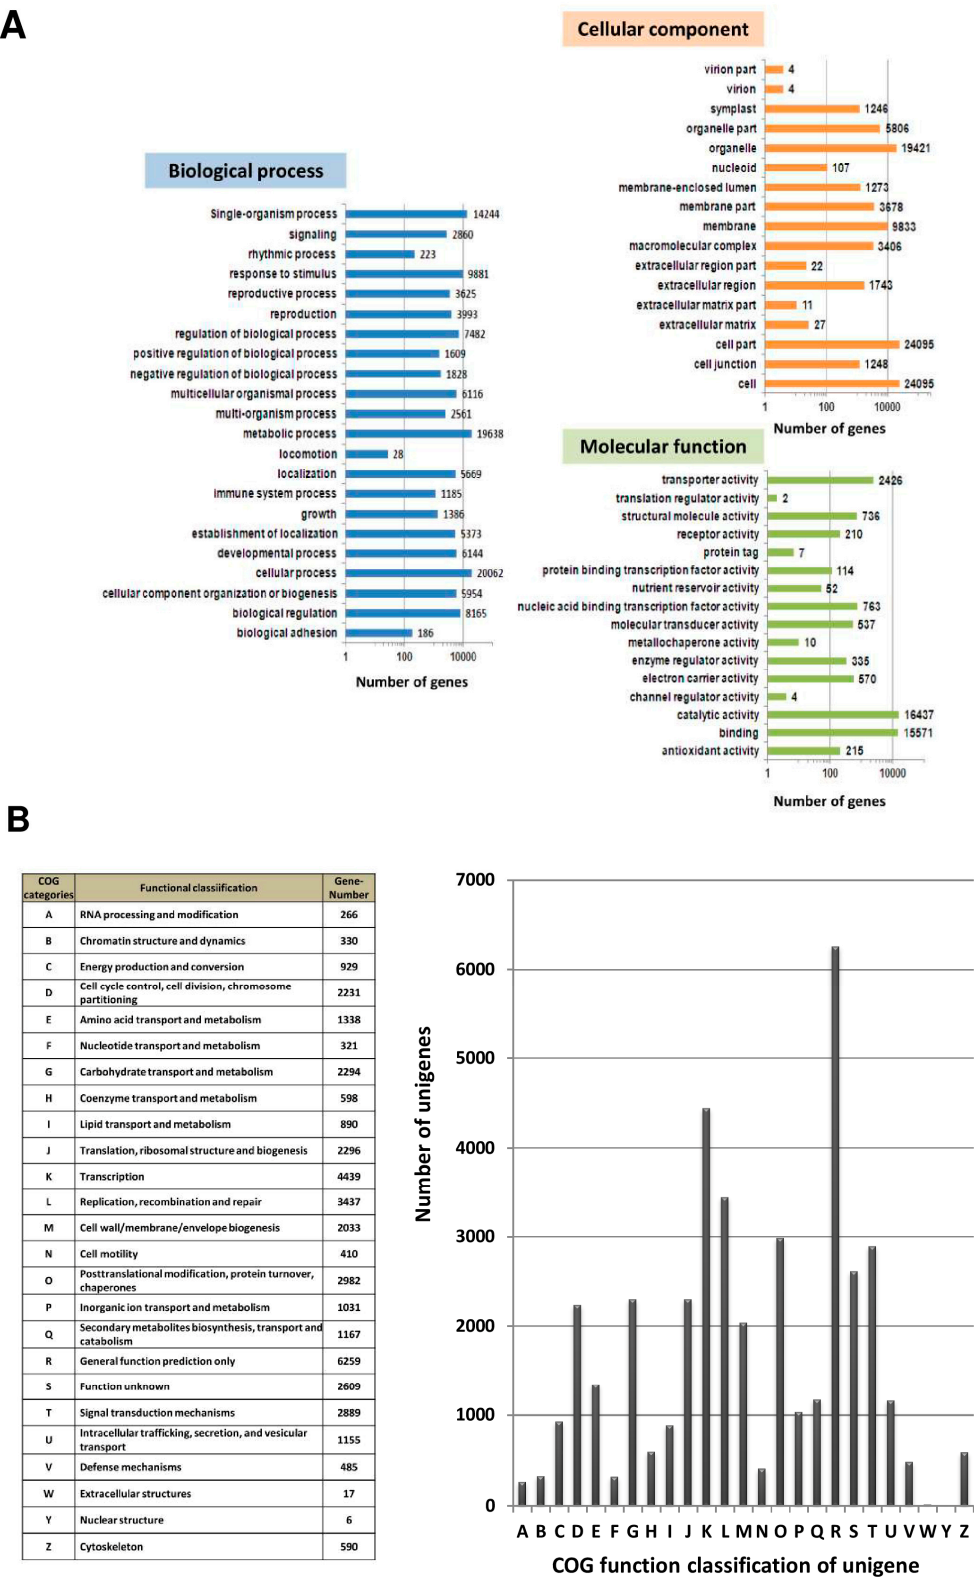

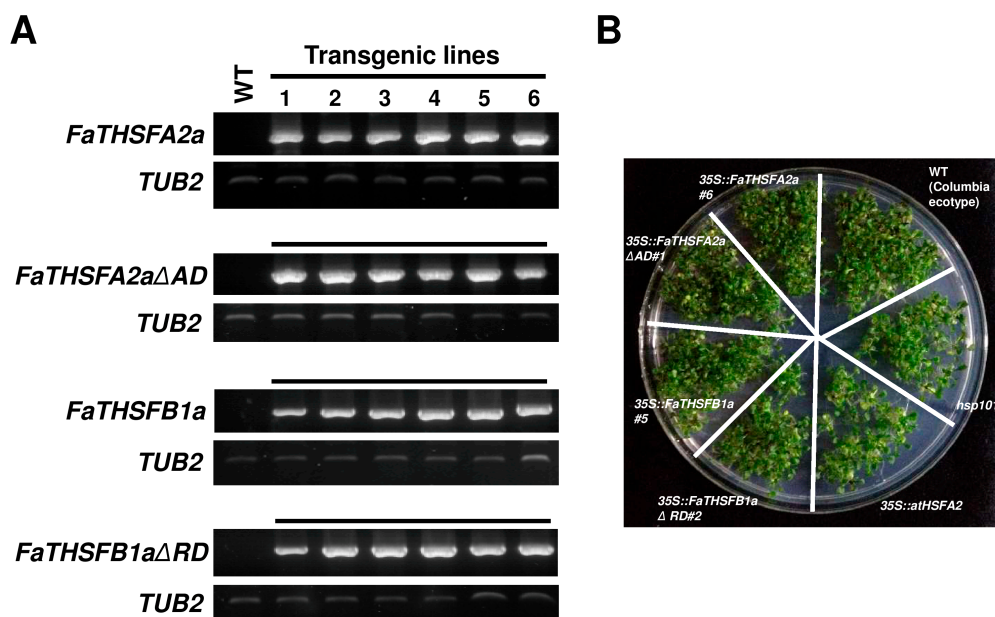

**Figure S4.** Generation of *FaTHSFA2a* and *FaTHSFB1a*-overexpressing transgenic *Arabidopsis* plants. (A) The electrophoresed gel displayed high expression of *FaTHSFA2a*, *FaTHSFA2aΔAD*, *FaTHSFB1a*, and *FaTHSFB1aΔRD* in transgenic lines #1–#6. Total RNAs extracted from 10-day-old plants grown in MS medium at 22 °C were used in RT-PCR analysis with gene-specific primer sets (Table S4). *TUB2* was used as the loading control; (B) The photographs of 12-day-old transgenic lines (*FaTHSFA2a*#6, *FaTHSFA2aΔAD*#1, *FaTHSFB1a*#5, *FaTHSFB1aΔRD*#2, and 35S::atHSFA2), *hsp101* mutant, and wild-type (WT) were cultivated on 1/2MS media at 22 °C. Transgenic lines are indistinguishable from WT *Arabidopsis* considering the phenotype during growth under normal conditions.
